# Supplementary material
Source: Royal Society of Chemistry journal article supplement (doi:10.1039/d6nr00926c)
Supplement: d6nr00926c1.pdf [file d6nr00926c1.pdf]

## Supplementary Data

### All-Carbon Patterning of HOPG on the Nanometer Scale with non-IPR Fullerenes

Artur Böttcher<sup>a</sup>, Stefan-Sven Jester<sup>b</sup>, Daniel Löffler<sup>a</sup>, Johannes Seibel<sup>a</sup> and Manfred M. Kappes<sup>a,c</sup>

<sup>a</sup>Institute of Physical Chemistry, Karlsruhe Institute of Technology, Kaiserstraße 12, 76131 Karlsruhe, Germany;

<sup>b</sup>Kekulé-Institut für Organische Chemie und Biochemie, Rheinische Friedrich-Wilhelms-Universität Bonn, Gerhard-Domagk-Str. 1, 53121 Bonn, Germany;

<sup>c</sup>Institute of Nanotechnology, Karlsruhe Institute of Technology, Kaiserstraße 12, 76131 Karlsruhe, Germany.

**Figure S1:** Morphology of the FIB spots

**Figure S2:** AFM images and line profiles documenting height of amorphous carbon pinning sites and associated C<sub>58</sub> islands following annealing

**Figure S3:** Typical AFM images for C<sub>58</sub>/FIB/HOPG surfaces after C<sub>58</sub> deposition and *ten* minutes in-situ annealing at 550 K for arrays with lattice constants:  $a = 300, 450, 600, 750$  and 900nm.

**Figure S4:** AFM images documenting diffusion limited aggregation and ripening of C<sub>58</sub> islands prepared on a FIB prestructured surface (before and after thermal annealing)

**Figure S5:** AFM images of C<sub>60</sub>/FIB/HOPG surfaces recorded after annealing (image *a*,  $a = 900$ nm) and without annealing (image *b*,  $a = 750$ nm)

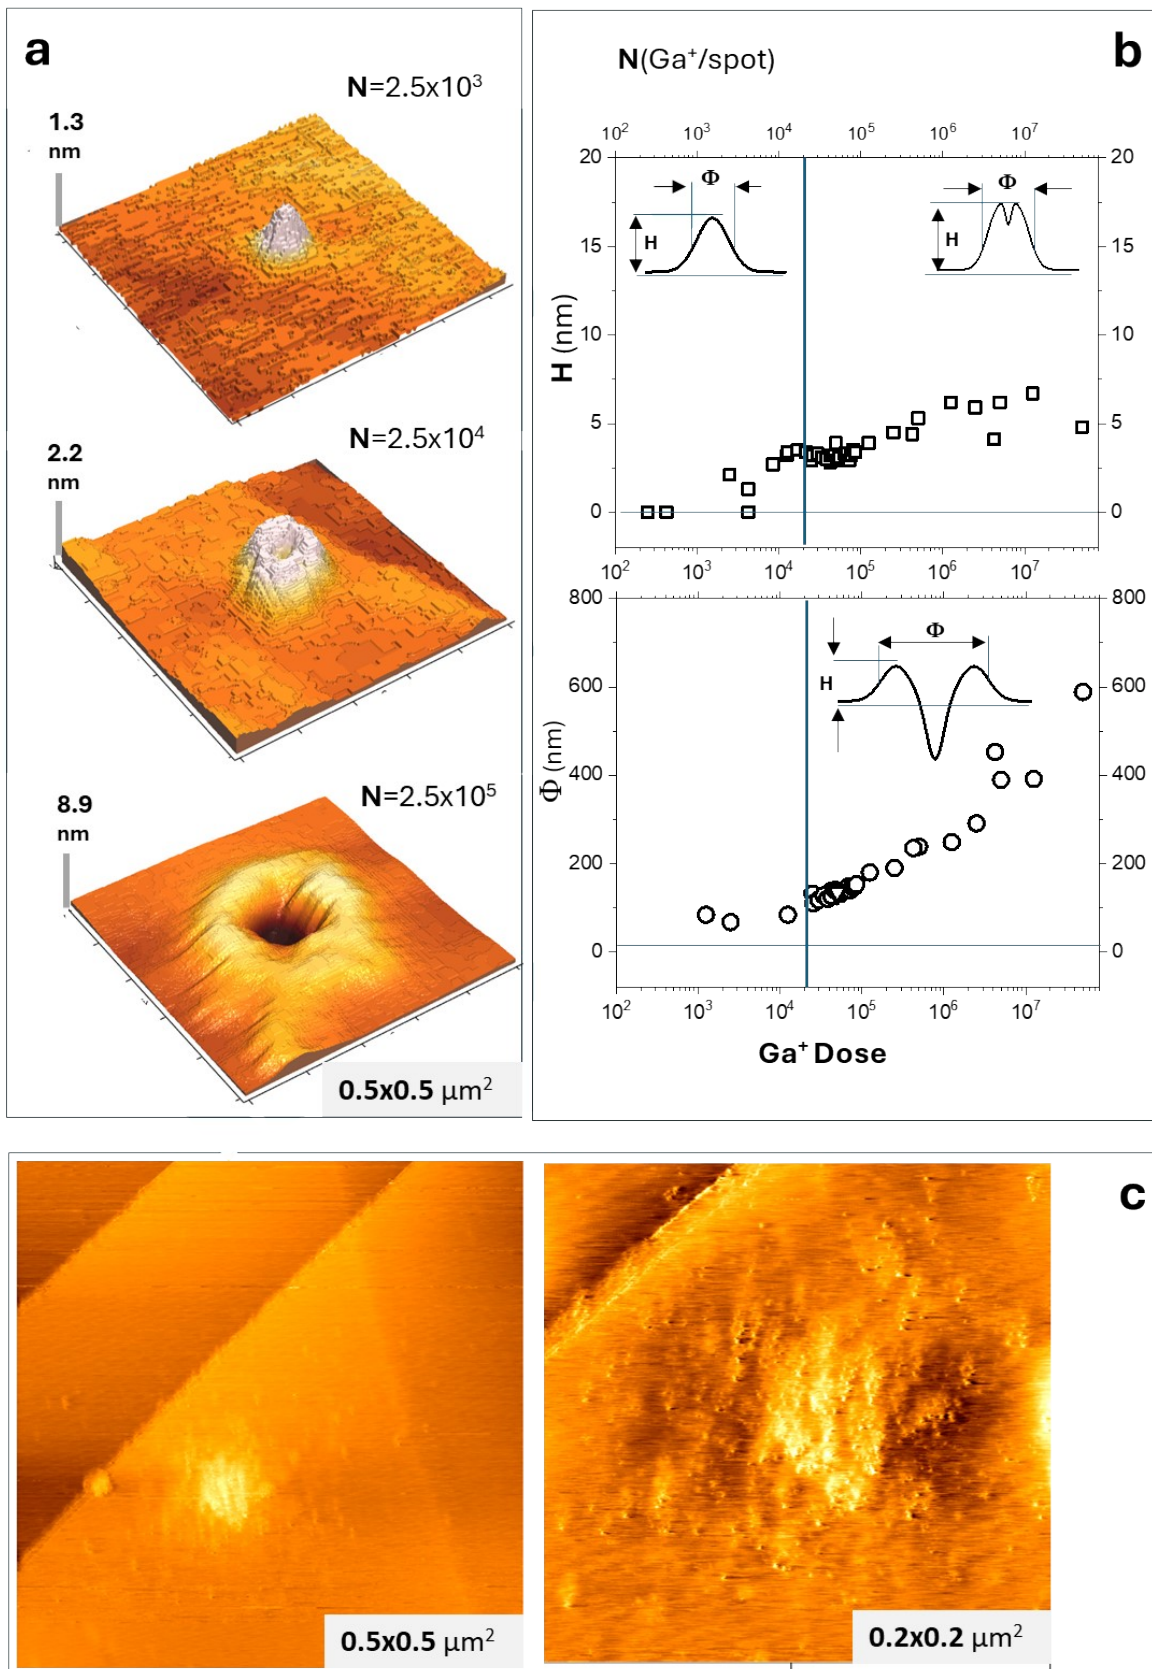

**Fig. S1:** AFM (A) and STM (C) images illustrating the morphology of amorphous carbon spots created by the interaction of the focused  $\text{Ga}^+$  beam (30 keV) with the HOPG basal plane. Panel A shows the ion dose dependency of the spot profiles: increasing ion dose from  $10^3$  to  $10^5$   $\text{Ga}^+/\text{spot}$  changes the defect form from small, bell-shaped hillocks to volcano-like protrusions with a large crater in the center. For doses  $<10^4$   $\text{Ga}^+/\text{spot}$  the mean height of the hillocks drops below 2 nm and their characteristic diameter

(full width at half maximum, FWHM) is  $\sim 100$  nm. For  $N < 10^4$   $\text{Ga}^+$  ions, hillocks with bell-like shapes were observed. For larger  $\text{Ga}^+$  doses volcano-like profiles with a crater in the center grow in width and depth. The STM images in panel C show that low-amplitude topographic “halos” (extending beyond  $\phi$ ) form about some spots, e.g. due to redeposition of ejected material or backscattering of C atoms from the collision cascade. This is reflected by the bright dot-shaped features adjacent to the main FIB impact region in the STM image (imaging conditions:  $U_{\text{tip}} = +50$  mV,  $I = 1$  nA). These halos may contribute to the effective capture cross-section for diffusing  $\text{C}_{58}$ .

We performed TRIM calculations for low ion dose of  $N = 2.5 \times 10^3$  ions/dot.[1] The results evidence lateral extension of the amorphous dots of  $\sim 80$  nm, which fits well to the profiles measured for low dose patterning,  $< 10^4$  ions/dot. The simulations are based on the assumption of local amorphization of graphene stacks as the main defecting process.[2] Panel B shows three groups of elevation profiles we found experimentally by AFM when increasing the  $\text{Ga}^+$  dose in the range  $10^3 - 10^7$ . For all profiles we measured the height  $H$  and the lateral extension  $\phi$  (diameter) as explained by the schemes in panel B. The width and height of the hillock profiles are plotted as functions of the  $\text{Ga}^+$  dose (panel B). The elevation profiles of single hillocks change considerably with increasing  $\text{Ga}^+$  dose: for doses  $< 10^4$  ions/dot narrow single bell-like profiles are observed. For moderate doses,  $10^4 - 10^5$  ions/dot, small holes start to be drilled in the bell-like profiles (the vertical lines in panel B mark the dose where the formation of craters sets on). All hillocks created by applying ion doses  $> 10^5$  ions/dot exhibit wide volcano-like profiles with deep craters in the center (see the lower plot in panel B). Our analysis of the hillock profiles fits well with the data published by B.S. Archanjo et al. [3]

All our  $\text{C}_{58}$  deposition experiments were performed using defect arrays prepared in the low dose regime,  $N < 10^4$ , which provides bell like spots with heights of 1-2 nm and lateral extensions around  $\phi \sim 100$  nm (panel B and C). This choice is supported by the range of the mean free gliding length  $\Lambda$  which is estimated to be around 300 nm and consequently enables to study the surface diffusion mediated island growth. Note also, that  $\text{Ga}^+$  implantation leads to deep subsurface deposition of (chemically inert) gallium atoms which we assume do not influence  $\text{C}_{58}$  island growth.

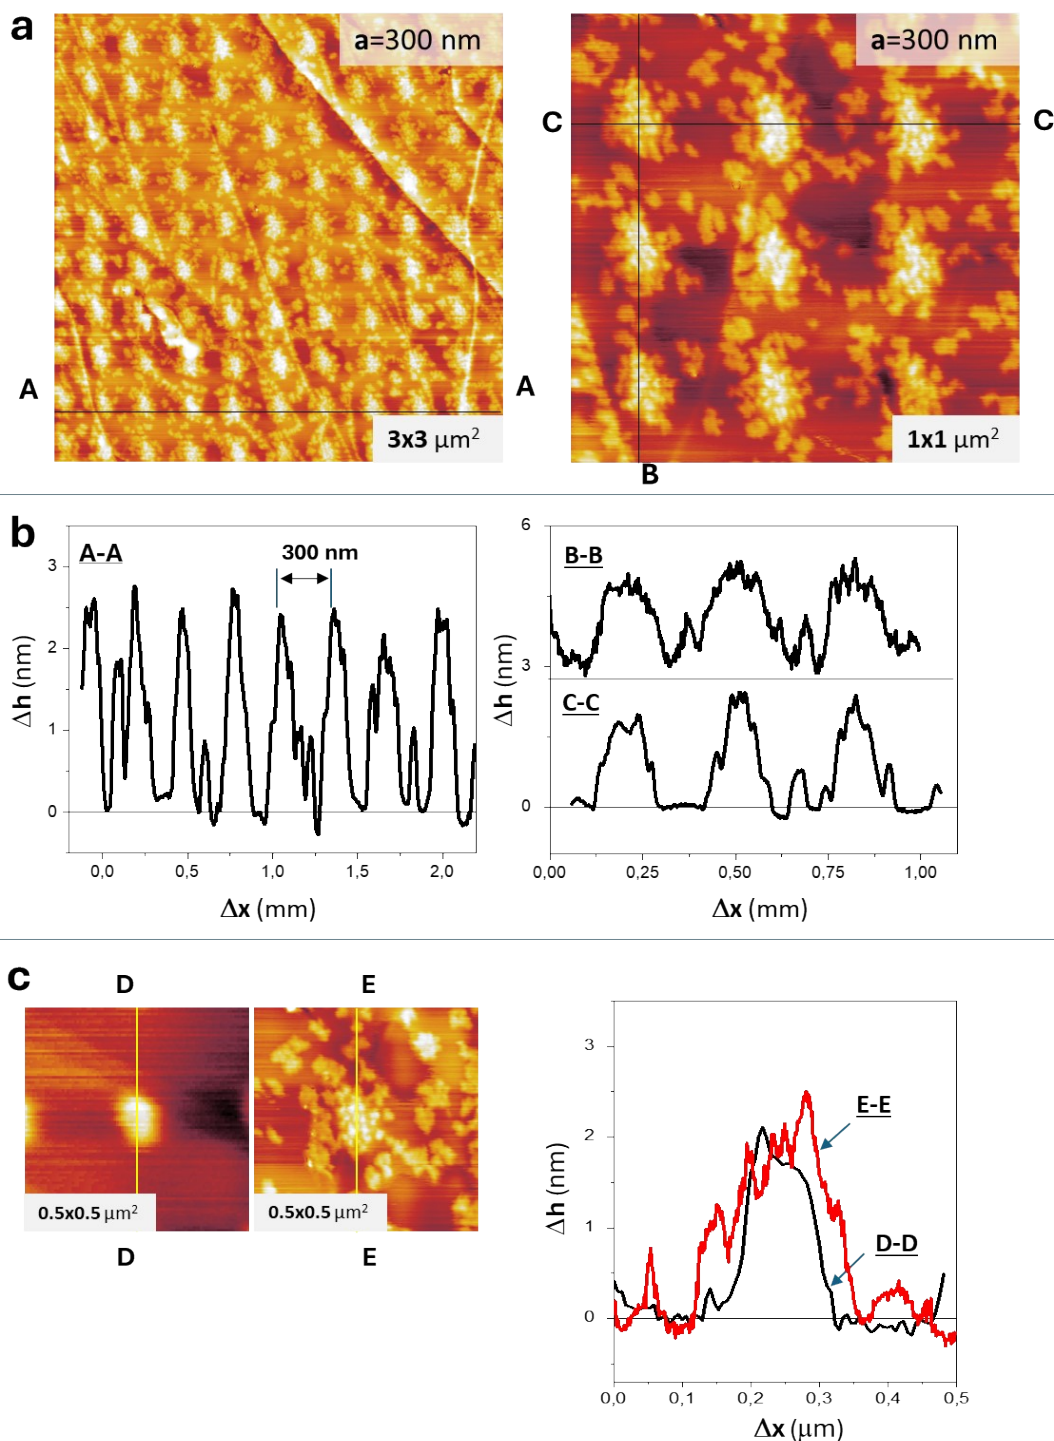

**Fig. S2:** AFM images and line scans for a  $C_{58}$ /FIB/HOPG surface to illustrate the nominal height of FIB structured amorphous carbon pinning sites versus the height of  $C_{58}$ -derived islands as generated by ion deposition onto FIB defect arrays and subsequent thermal annealing. (a)  $3 \times 3 \mu\text{m}^2$  and  $1 \times 1 \mu\text{m}^2$  images of the same sample, (b) corresponding line scans, (c) high resolution  $0.5 \times 0.5 \mu\text{m}^2$  image of an as-generated FIB defect and of a FIB defect on the same substrate after  $C_{58}$  decoration and corresponding line scans. The line scans indicate that the mean height of the pinning sites remains about the same after  $C_{58}$  decoration – ca.  $2 \text{ nm}$ . This suggests that island growth takes place preferentially by attachment of mobile cages to the *rims* of dendritic islands (via intercalation bridges, -2AP-2AP-). (FIB:  $I=10 \text{ pA}$ ,  $t=0.4 \text{ ms}$ ,  $D^+=2.5 \times 10^4 \text{ Ion/spot}$ ,  $a = 300 \text{ nm}$ ; LECBD:  $E_0 = 6 \text{ eV}$ ,  $Q = 1 \text{ ML } C_{58}$ , annealing  $A[10'/550\text{K}]$ ).

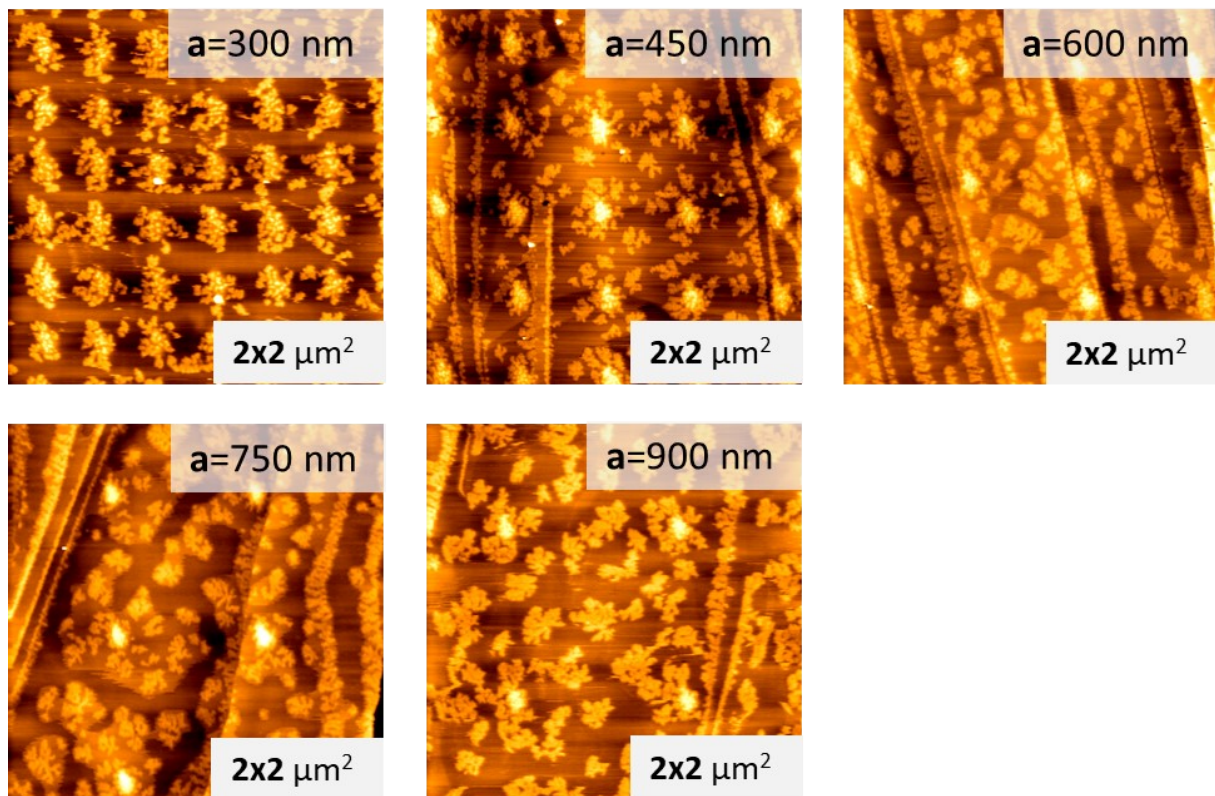

**Fig. S3:** Typical AFM images ( $2 \times 2 \mu\text{m}^2$ ) for  $\text{C}_{58}$ /FIB/HOPG surfaces obtained after  $\text{C}_{58}$  deposition followed by *ten* minute in-situ annealing at 550 K - using five arrays differing in their lattice constants:  $a = 300, 450, 600, 750$  and  $900$  nm. These images were used to evaluate island coverages as indicated in figure 3(c) main text. Best decoration quality ratio under the conditions used is obtained for a 300 nm period array (FIB:  $I = 10$  pA,  $t = 0.4$  ms,  $D^+ = 2.5 \times 10^4$  ions/spot,  $a = 300\text{-}900$  nm; LECBD:  $E_0 = 6$  eV,  $Q = 1$  ML  $\text{C}_{58}$ ,  $A[10'/550\text{K}]$ ). This series illustrates the competition between the “natural” defects in the HOPG surface (predominantly step edges) and the FIB written defects. Both types of “defects” can act as pinning sites. When the distance between adjacent FIB defects,  $a$ , becomes shorter than the mean gliding length of sticking  $\text{C}_{58}$  cages on wide terraces,  $\Lambda$ , pinning is governed nearly exclusively by the FIB defects.

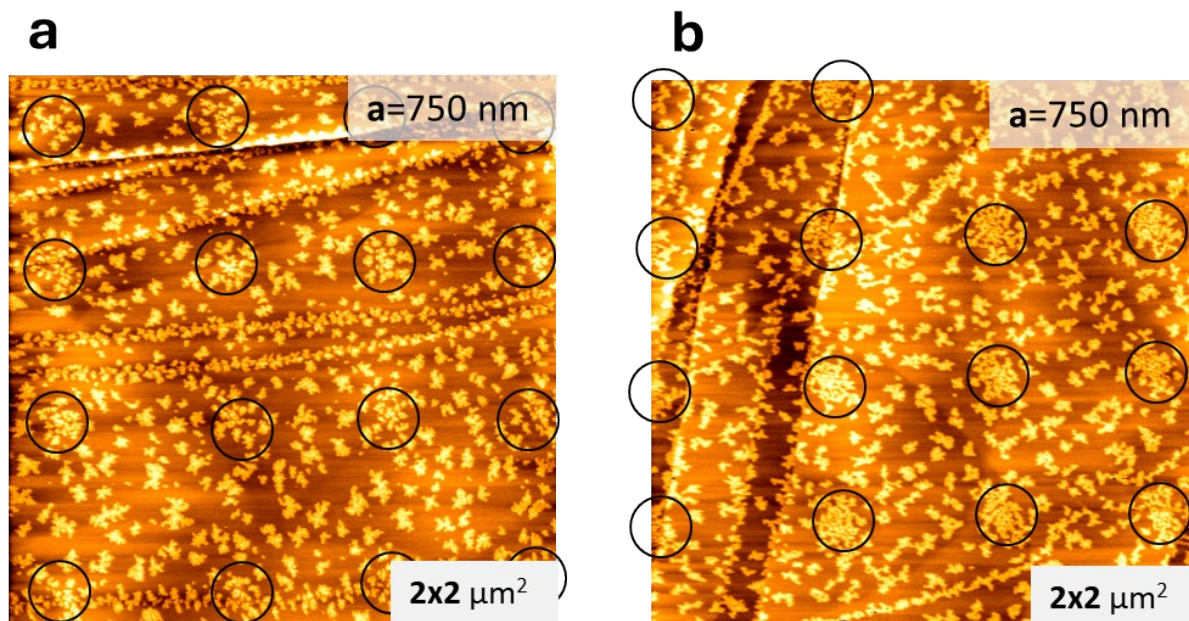

**Fig. S4:** Typical AFM images ( $3 \times 3 \mu\text{m}^2$ ) for two separate  $\text{C}_{58}$ /FIB/HOPG samples both with 750 nm defect lattice constant: (a) after room temperature  $\text{C}_{58}$  deposition (followed directly by transfer to an ex-situ AFM without a thermal annealing step) and (b) after an intermediate thermal annealing step in which the sample was heated to 550 K for five minutes. The black circles are meant to guide the eye. Heating enhances the accumulation of  $\text{C}_{58}$  cages about the defect arrays. (Patterning conditions  $\rightarrow$  FIB:  $I = 10 \text{ pA}$ ,  $t = 0.4 \text{ ms}$ ,  $D^+ = 2.5 \times 10^4 \text{ Ions/spot}$ ,  $a = 750 \text{ nm}$ ; LECBD:  $E_0 = 6 \text{ eV}$ ,  $Q = 1 \text{ ML } \text{C}_{58}$ ,  $A[5'/550\text{K}]$ ).

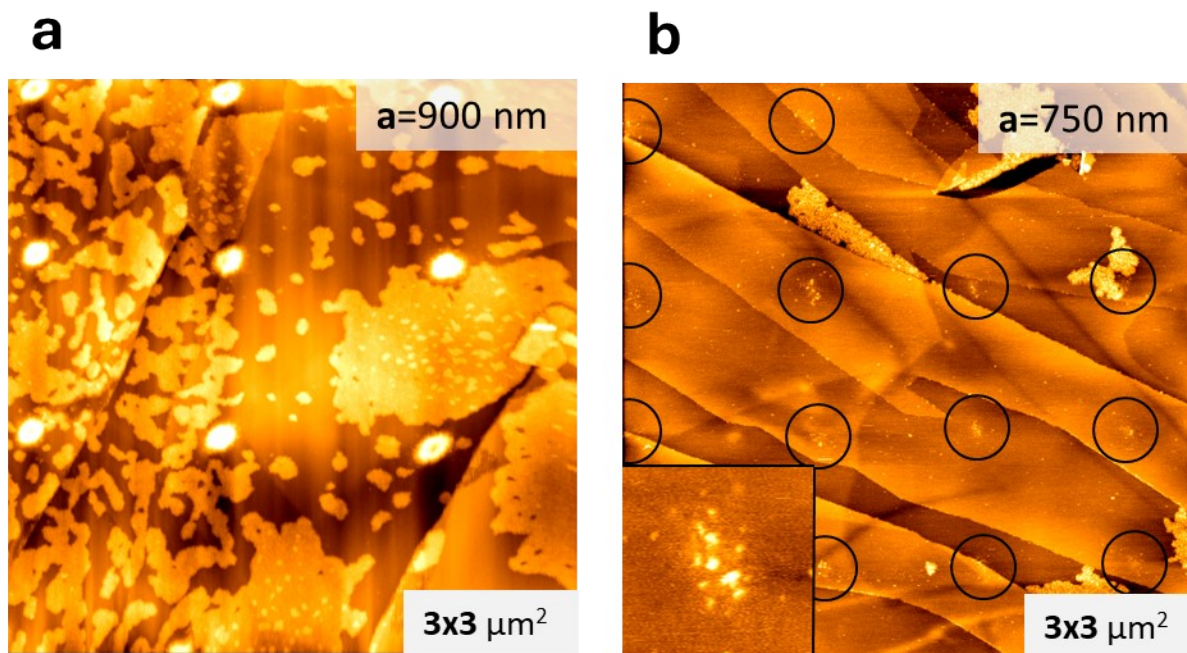

**Fig. S5:** **a)** AFM image ( $3 \times 3 \mu\text{m}^2$ ) taken after deposition of a submonolayer of  $\text{C}_{60}$  onto a  $\text{Ga}^+$ -FIB patterned HOPG surface (2D array with lattice constant of 900 nm) followed by thermal annealing. The resulting surface is decorated by large compact islands terminated by smooth rims (in contrast to equivalently generated  $\text{C}_{58}$  island films which are dendritic in nature, see e.g. Fig. S3). It appears that  $\text{C}_{60}$  islands are growing independently of the FIB dots (white spots), i.e. their pinning role is not recognizable. The smooth island rims reflect thermally activated surface diffusion of van der Waals interacting  $\text{C}_{60}$  cages – which only become stabilized at threefold and higher coordinated rim sites (FIB:  $I=10 \text{ pA}$ ,  $t=0.4 \text{ ms}$ ,  $D^+= 5.5 \times 10^4 \text{ Ion/spot}$ ,  $a=900 \text{ nm}$ ; LECBD:  $E_0= 6 \text{ eV}$ ,  $Q=3 \text{ ML } \text{C}_{60}$ ;  $A[5'/500\text{K}]$ ). **b)** AFM image ( $3 \times 3 \mu\text{m}^2$ ) of a  $\text{C}_{60}$ /FIB/HOPG surface with 750 nm lattice constant defect array after soft-landing  $\text{C}_{60}$  at room temperature under the same conditions as for  $\text{C}_{58}$  in figure S4(a), i.e. *no subsequent thermal annealing step* before AFM imaging. Note, that the surface is covered with large compact islands which are predominantly not associated with the FIB defects. On closer inspection, the amorphous carbon defects show a few protrusions attributable to direct sticking of  $\text{C}_{60}^+$  incident from gas-phase. (FIB:  $I=10 \text{ pA}$ ,  $t=0.4 \text{ ms}$ ,  $D^+= 2.5 \times 10^4 \text{ Ion/spot}$ ,  $a=750 \text{ nm}$ ; LECBD:  $E_0= 6 \text{ eV}$ ,  $Q=0.5 \text{ ML } \text{C}_{60}$ ;  $A[5', 500\text{K}]$ ).

## References

- [1] S.-S. Jester, Nanostrukturierte Kohlenstoffverbindungen, Dissertation, Karlsruhe Institut für Technologie, 2008. <https://doi.org/10.5445/IR/1000009952>.
- [2] J.P. Biersack, L.G. Haggmark, A Monte Carlo computer program for the transport of energetic ions in amorphous targets, *Nuclear Instruments and Methods* **1980**, *174*, 257–269.
- [3] B.S. Archanjo, I.O. Maciel, E.H. Martins Ferreira, S.B. Peripolli, J.C. Damasceno, C.A. Achete, A. Jorio, Ion beam nanopatterning and micro-Raman spectroscopy analysis on HOPG for testing FIB performances, *Ultramicroscopy* **2011**, *111*, 1338–1342.
